# Supplementary material for: XGBoost-based and tumor-immune characterized gene signature for the prediction of metastatic status in breast cancer
Source: Springer Nature journal article supplement (doi:10.1186/s12967-022-03369-9), 2022-04-18

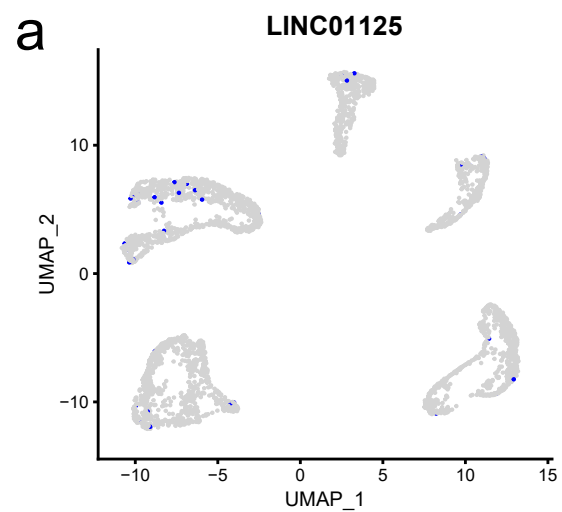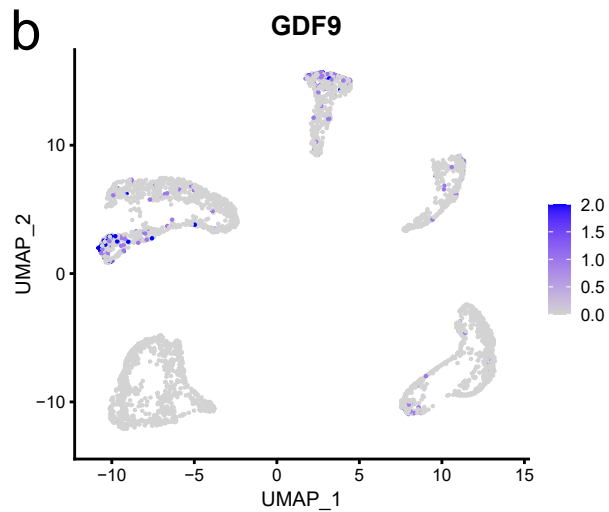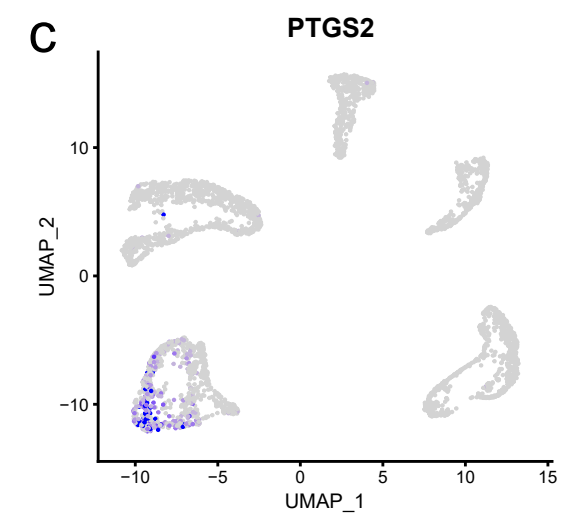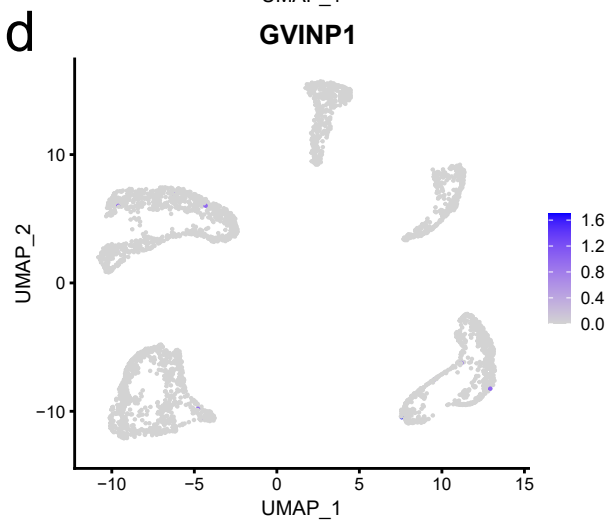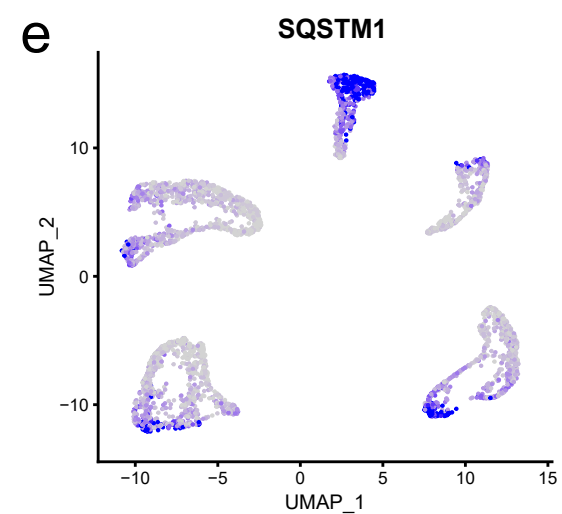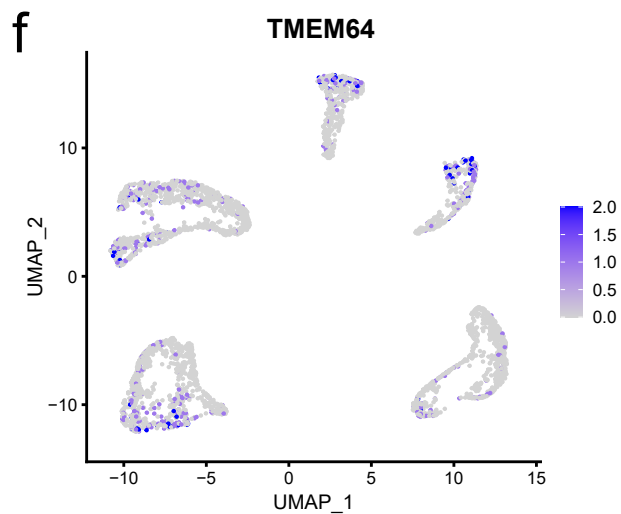

Supplement: MOESM2 [file 20320910]
